# Supplementary material for: Alcohol consumption in 0.5 million people from 10 diverse regions of China: prevalence, patterns and socio-demographic and health-related correlates
Source: PubMed Central journal article supplement — Int J Epidemiol. 2013 Aug 1;42(3):816–27. doi: 10.1093/ije/dyt078 (PMC3733702; doi:10.1093/ije/dyt078), 2013-08-01
Supplement: supp_dyt078_Supplementary_material.pdf [file supp_dyt078_Supplementary_material.pdf]

## **Supplementary material**

## Figure legends

**eFigure 1. Location of the China Kadoorie Biobank study areas**

**eFigure 2. Prevalence of drinking and amount and type of alcohol drunk**

**among women, in the ten study areas.** Prevalence estimates and mean amount drunk are adjusted for age. \*The shaded areas in (b) represent the proportion (%) of drinkers in each area consuming each type of alcohol (only one type was reported for each drinker). Areas are ordered by prevalence of ever weekly drinking. U=urban, R=rural.

**eFigure 3. Drinking patterns in 6248 female weekly drinkers, by age group.** The prevalence in weekly drinkers in urban and rural regions of: (a) drinking heavily (>40 g in one session) at least once a week; (b) drinking heavily on special occasions; (c) drinking daily or almost every day; (d) drinking usually with meals; (e) drinking spirits; (f) drinking beer. Values on the x-axis are plotted at the mean age of each 10-year age group. Error bars are 95% confidence intervals. The circle area is proportional to the sample size.

**eFigure 1. Locations of the China Kadoorie Biobank study areas**

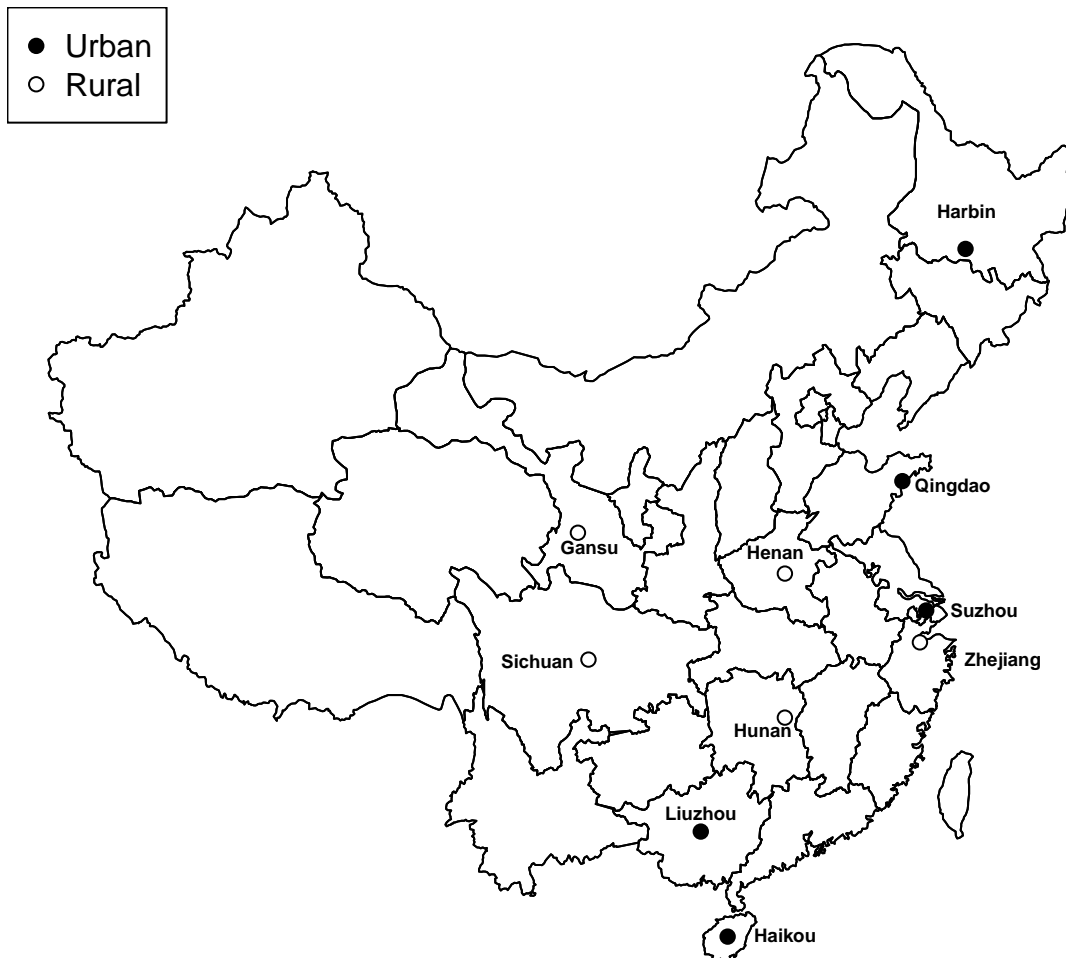

eFigure 2. Prevalence of drinking and amount and type of alcohol drunk among women, in the ten study areas

a) Prevalence of ever weekly drinking  
(N= 302 669)

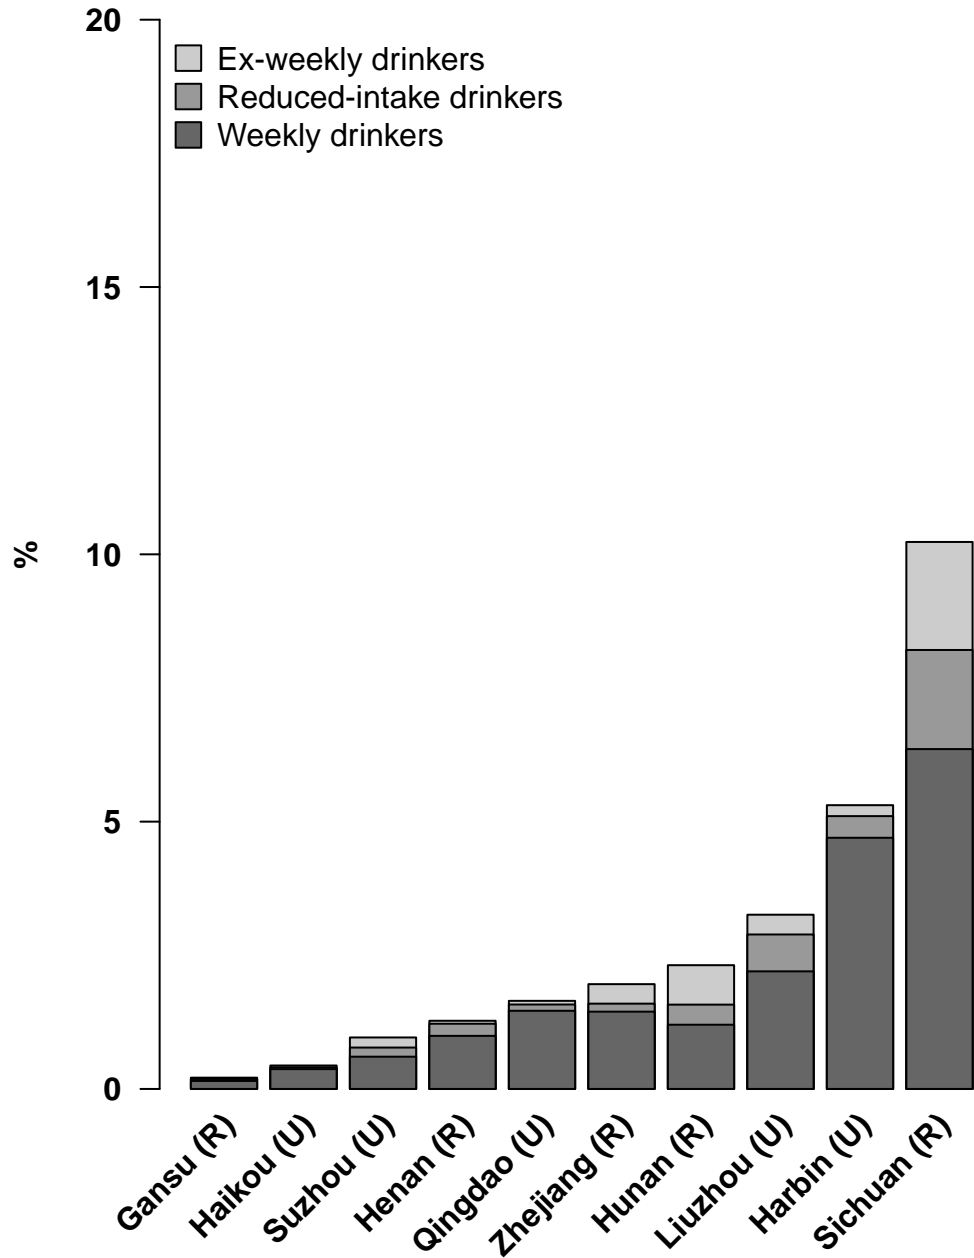

b) Amount and type\* of alcohol consumed  
by weekly drinkers (N= 6248)

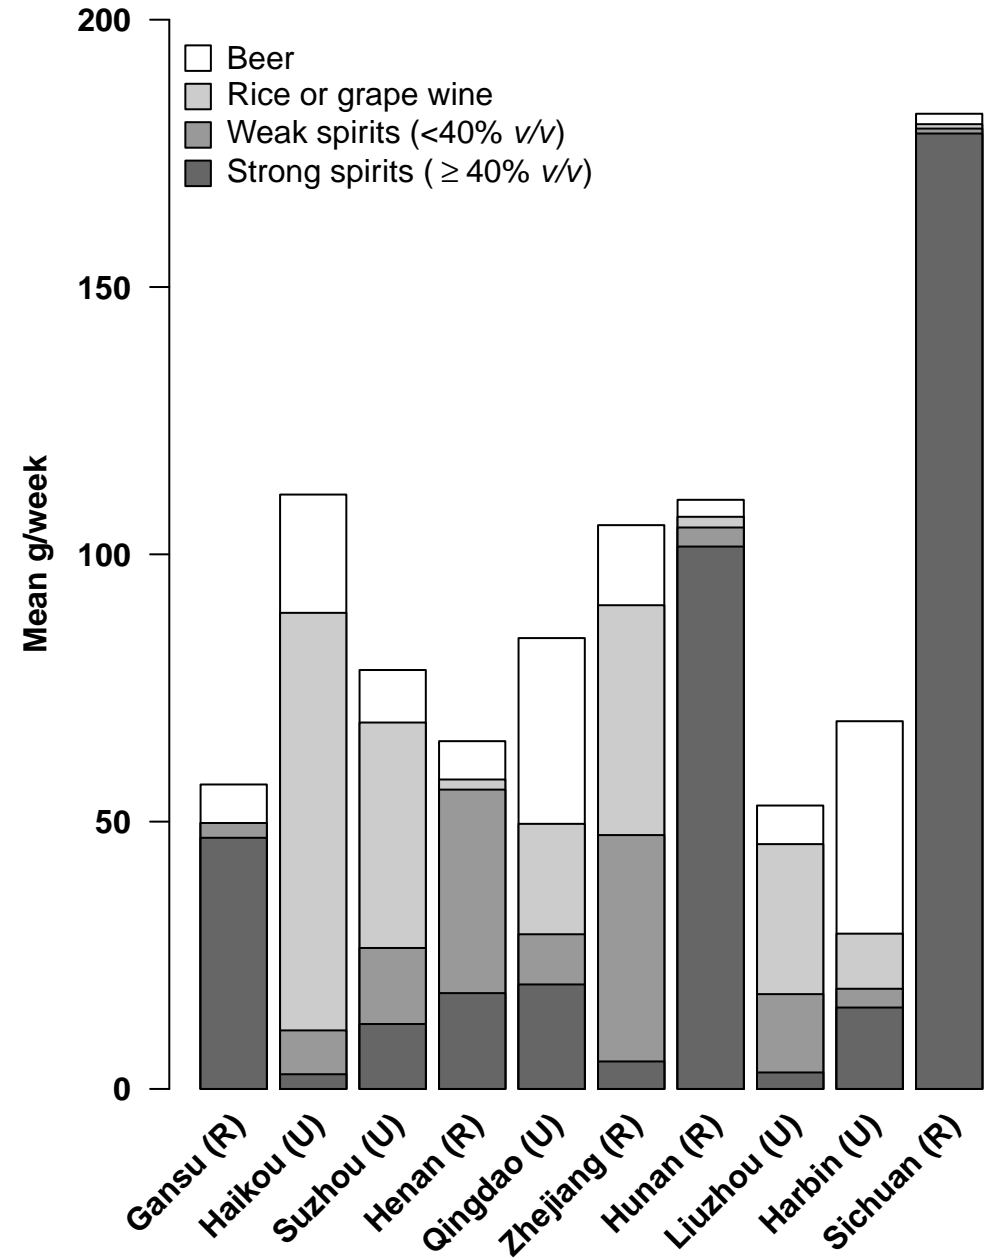

**eFigure 3. Drinking patterns in 6248 female weekly drinkers, by age group**

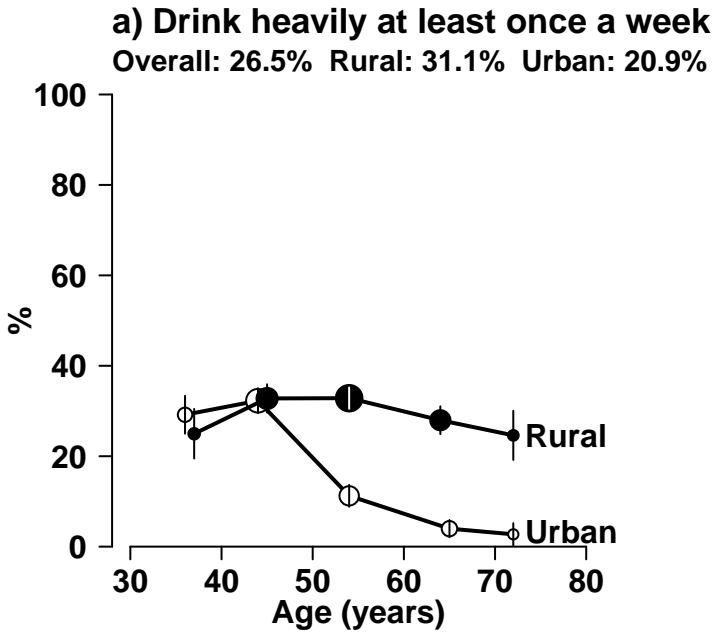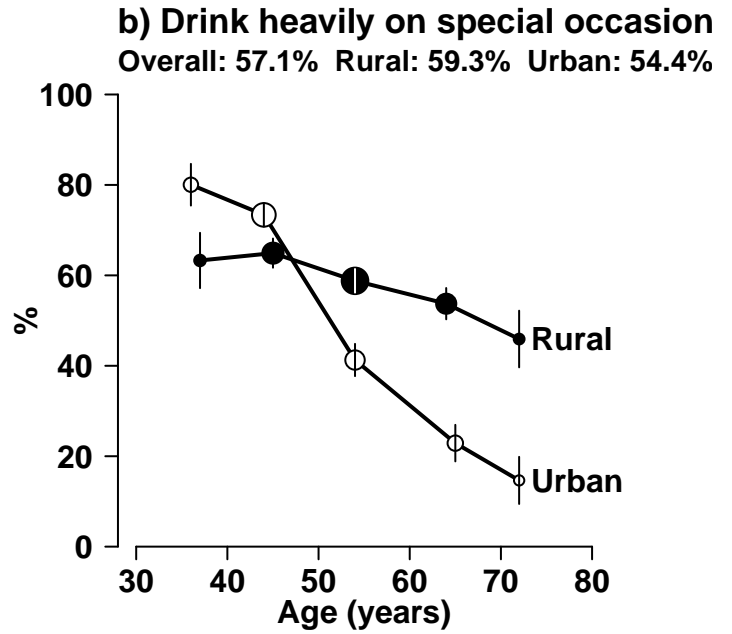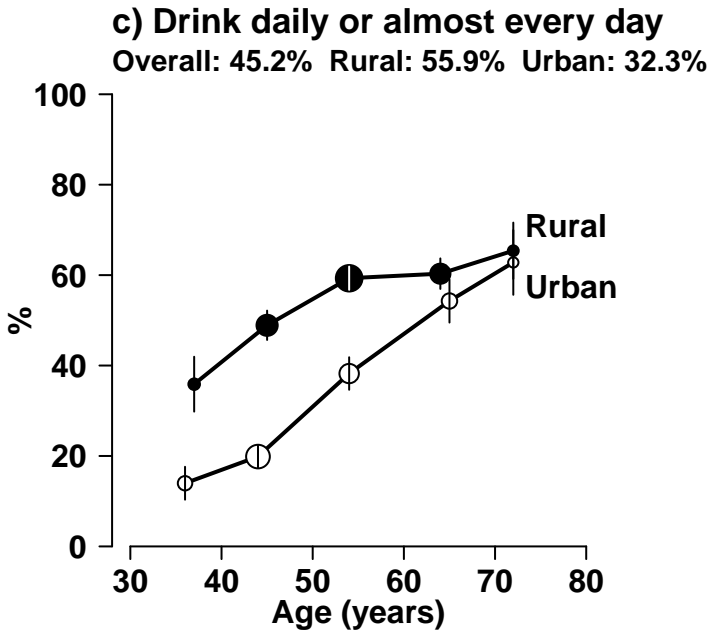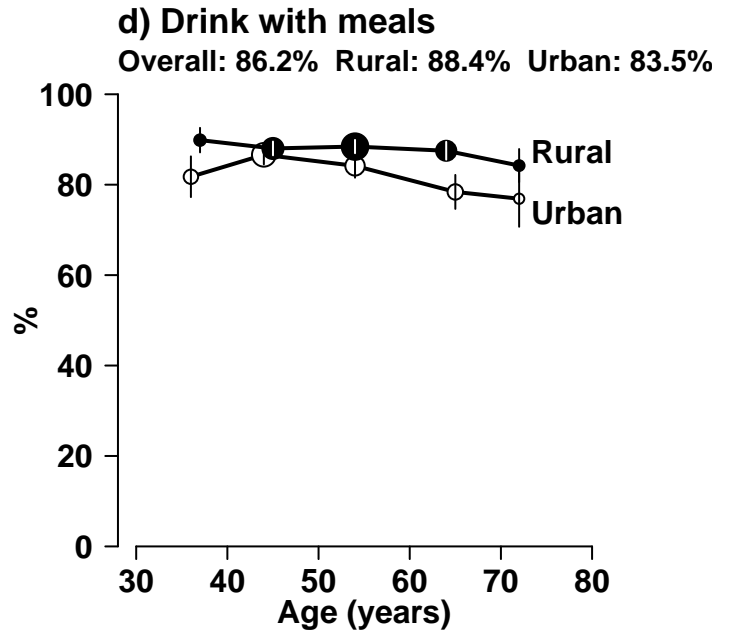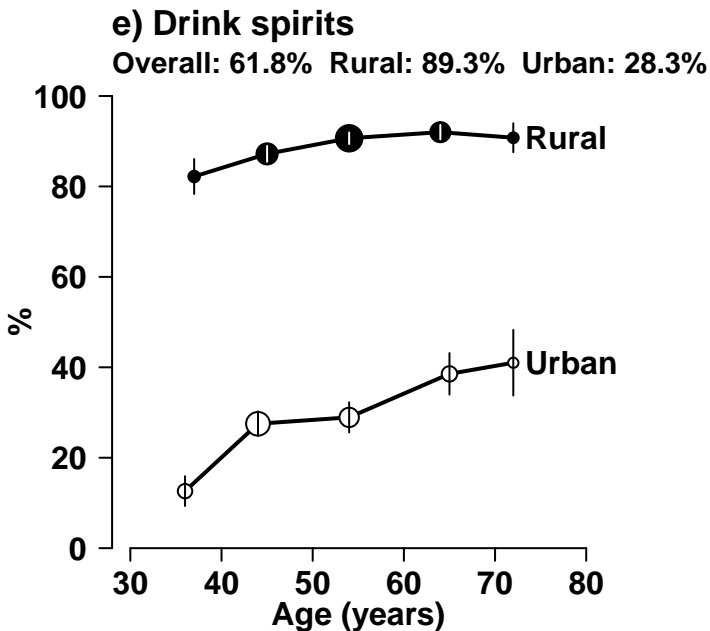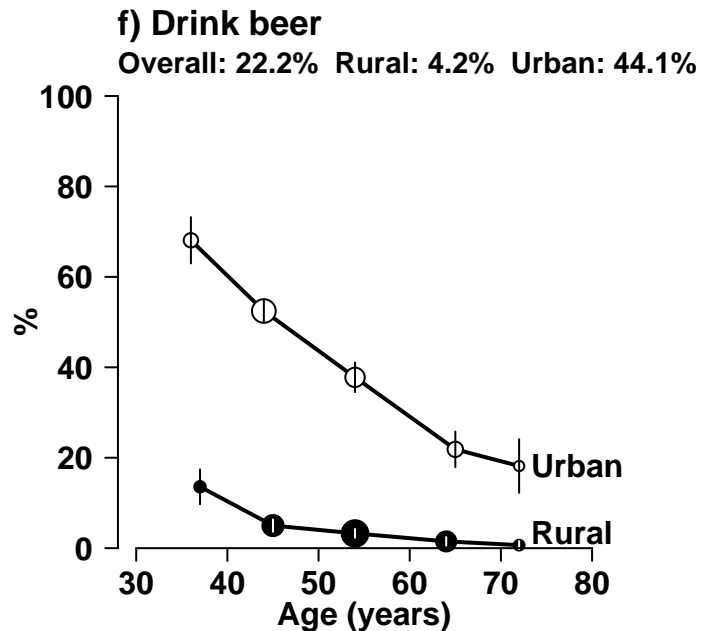

**eTable 1. Association of alcohol consumption with selected variables in 302 699 women**

|                                              | Current non-drinkers |                  | Current drinkers |                      |        |                                 |       |       |       |                         |       |
|----------------------------------------------|----------------------|------------------|------------------|----------------------|--------|---------------------------------|-------|-------|-------|-------------------------|-------|
|                                              | Abstainers           | Ex-weekly        | Reduced-intake   | Occasional           | Weekly | Amount drunk by weekly drinkers |       |       |       | Heavy episodic drinking |       |
|                                              |                      |                  |                  |                      |        | Category (g/week)               |       |       |       |                         |       |
|                                              |                      |                  |                  |                      |        | (mean of each category)         |       |       |       |                         |       |
| <70<br>(34)                                  | 70-139<br>(113)      | 140-279<br>(231) | 280+<br>(464)    | P-trend <sup>a</sup> |        |                                 |       |       |       |                         |       |
| Number of women (N)                          | 192 435              | 1333             | 1325             | 101 328              | 6248   | 3226                            | 1587  | 992   | 443   |                         | 1655  |
| Mean age (years)                             | 52.2                 | 56.5             | 53.2             | 48.8                 | 52.5   | 52.5                            | 52.4  | 51.6  | 51.1  | 0.22                    | 49.9  |
| Mean BMI (kg/m <sup>2</sup> )                | 23.9                 | 24.4             | 24.2             | 23.8                 | 23.7   | 23.7                            | 23.8  | 24.4  | 24.0  | 0.77                    | 24.1  |
| Mean waist:hip ratio                         | 0.87                 | 0.87             | 0.88             | 0.86                 | 0.87   | 0.86                            | 0.87  | 0.88  | 0.87  | <0.0001                 | 0.88  |
| Mean SBP (mmHg)                              | 130.8                | 132.6            | 129.2            | 127.8                | 127.8  | 127.5                           | 128.0 | 132.8 | 132.0 | 0.0003                  | 130.0 |
| Mean DBP (mmHg)                              | 77.1                 | 77.7             | 77.1             | 76.0                 | 76.5   | 76.1                            | 77.0  | 78.3  | 79.3  | <0.0001                 | 78.5  |
| Mean heart rate (beats/minute)               | 80.1                 | 78.9             | 77.1             | 78.8                 | 78.1   | 77.6                            | 78.5  | 79.6  | 77.3  | 0.0002                  | 79.2  |
| Mean random blood glucose (mmol/L)           | 6.2                  | 6.4              | 6.1              | 6.0                  | 6.0    | 6.0                             | 5.9   | 6.1   | 5.9   | 0.39                    | 6.1   |
| Mean MET hours/week                          | 9.2                  | 8.8              | 9.8              | 9.6                  | 9.6    | 9.6                             | 9.6   | 9.4   | 10.1  | 0.92                    | 9.8   |
| Regular smoker (%)                           | 1.9                  | 5.5              | 5.9              | 2.8                  | 8.0    | 5.5                             | 8.2   | 14.7  | 19.9  | <0.0001                 | 26.4  |
| Regular tea-drinker (%)                      | 19.3                 | 33.3             | 36.1             | 26.2                 | 41.8   | 40.4                            | 44.8  | 47.9  | 33.8  | 0.01                    | 39.5  |
| Self-reported poor health (%)                | 12.6                 | 26.4             | 19.0             | 9.6                  | 8.0    | 7.7                             | 8.0   | 9.1   | 6.0   | 0.63                    | 8.7   |
| History of chronic disease <sup>b</sup> (%)  | 23.2                 | 39.8             | 28.9             | 20.8                 | 19.7   | 21.1                            | 18.6  | 17.6  | 20.4  | 0.04                    | 24.1  |
| Flushing response after drinking (%)         | -                    | -                | -                | -                    | 24.0   | 23.3                            | 20.4  | 16.1  | 14.5  | <0.0001                 | 20.0  |
| Problem drinking indicators <sup>c</sup> (%) | -                    | -                | -                | -                    | 9.8    | 3.8                             | 10.9  | 17.3  | 30.1  | <0.0001                 | 17.7  |

Prevalences and means are adjusted for age and area. BMI=body mass index; S/DBP=systolic/diastolic blood pressure; MET=metabolic equivalent task.

<sup>a</sup>P for trend by amount drunk category within weekly drinkers (P for heterogeneity across the five main drinking categories was <0.0001 for all variables).

<sup>b</sup>Diagnosed with one or more of: coronary heart disease, stroke, TIA, diabetes, cancer, TB, chronic hepatitis/cirrhosis, rheumatoid arthritis, peptic ulcer; chronic respiratory disease, gallstone/gallbladder disease, kidney disease.

<sup>c</sup>Reporting one or more in the past month of: drinking in the morning, unable to work or do anything due to drinking; depressed irritated or lost control due to drinking; couldn't stop drinking; had shakes when stopped drinking.
